# Supplementary material
Source: HighWire-hosted journal article supplement (https://www.jrheum.org/highwire/filestream/41588/field_highwire_adjunct_files/0/210755DataSuppl.pdf)
Supplement: 210755DataSuppl.pdf [file 210755DataSuppl.pdf]

**Suppl. Table 1.** Clinical data of major JIA categories documented in the NPRD

\* Number of patients who had this item documented at study inclusion. \*\* Mean cJADAS10 throughout study documentation (until uveitis onset, if applicable).

RF+ polyarthritis: rheumatoid factor-positive polyarthritis; RF- polyarthritis: rheumatoid factor-negative polyarthritis; pers: persistent; ext: extended; JPsA: juvenile psoriasis arthritis; ANA: antinuclear antibodies; HLA-B27: Human Leukocyte Antigen-B27; cJADAS10: Juvenile Arthritis Disease Activity Score 10; DMARD disease modifying antirheumatic drugs; csDMARD conventional-synthetic DMARD; bDMARD biological DMARD

|                                                      | RF+<br>polyarthritis | RF- polyarthritis | Oligoarthritis, pers. | Oligoarthritis, ext. | JPsA         | ERA          |
|------------------------------------------------------|----------------------|-------------------|-----------------------|----------------------|--------------|--------------|
| Number of patients                                   | 515                  | 3871              | 11189                 | 1357                 | 1862         | 3778         |
| Female sex [n (%)]                                   | 438 (85.0)           | 2845 (73.5)       | 7427 (66.4)           | 1062 (78.3)          | 1183 (63.5)  | 1384 (36.6)  |
| Age at study inclusion [y ± SD]                      | 14.01 ± 3.57         | 11.41 ± 4.74      | 8.93 ± 4.60           | 10.33 ± 4.90         | 12.10 ± 4.47 | 13.41 ± 3.14 |
| Age at arthritis diagnosis [y ± SD]                  | 11.58 ± 3.75         | 8.37 ± 4.68       | 6.38 ± 4.22           | 5.30 ± 4.14          | 9.03 ± 4.53  | 10.96 ± 3.37 |
| Age at uveitis diagnosis [y ± SD]                    | 6.45 ± 6.82          | 6.64 ± 4.09       | 5.34 ± 2.92           | 4.84 ± 3.07          | 8.35 ± 4.79  | 11.47 ± 3.87 |
| Age at first uveitis study documentation [y ± SD]    | 12.47 ± 5.50         | 9.43 ± 5.28       | 8.18 ± 4.37           | 9.23 ± 5.12          | 11.95 ± 5.64 | 14.15 ± 3.95 |
| Patients with uveitis [n (%)]                        | 12 (2.3)             | 277 (7.2)         | 1599 (14.3)           | 302 (22.3)           | 122 (6.6)    | 280 (7.4)    |
| JIA disease duration at study inclusion [y ± SD]     | 2.42 ± 2.83          | 3.03 ± 3.56       | 2.54 ± 3.12           | 5.06 ± 4.48          | 3.05 ± 3.64  | 2.45 ± 2.68  |
| Uveitis disease duration at study inclusion [y ± SD] | 10.31 ± 8.35         | 1.56 ± 3.81       | 2.11 ± 3.97           | 4.30 ± 4.78          | 3.28 ± 4.67  | 1.40 ± 2.57  |
| ANA positive [%] (n)*                                | 37.5 (395)           | 32.9 (2906)       | 42.6 (8558)           | 51.5 (1004)          | 26.7 (1296)  | 18.1 (2842)  |
| HLA-B27 positive [%] (n)*                            | 8.9 (424)            | 8.3 (3071)        | 7.7 (8669)            | 9.5 (1114)           | 13.4 (1539)  | 58.8 (3510)  |
| Mean cJADAS10**                                      | 8.95 ± 6.49          | 8.03 ± 6.21       | 4.38 ± 3.54           | 6.59 ± 5.11          | 5.52 ± 4.70  | 5.53 ± 4.33  |

|                                 |                                                                                             | PsA_1 group |                |        |
|---------------------------------|---------------------------------------------------------------------------------------------|-------------|----------------|--------|
| Variable                        |                                                                                             | HR          | CI             | p      |
| <b>Laboratory parameters</b>    | HLA-B27 positivity                                                                          | 2.194       | [0.925, 5.203] | 0.075  |
|                                 | ANA positivity                                                                              | 2.192       | [0.915, 5.250] | 0.078  |
| <b>Clinical characteristics</b> | age at PsA onset                                                                            | 0.878       | [0.809, 0.954] | 0.002  |
|                                 | male sex                                                                                    | 0.906       | [0.421, 1.949] | 0.800  |
|                                 | HAQ score                                                                                   | 1.206       | [0.588, 2.474] | 0.609  |
|                                 | cJADAS10 score                                                                              | 1.066       | [0.979, 1.161] | 0.139  |
|                                 | PGA (NRS)                                                                                   | 1.239       | [1.053, 1.458] | 0.010  |
|                                 | ESR                                                                                         | 1.036       | [1.014, 1.059] | 0.002  |
|                                 | Presence of psoriasis                                                                       | 0.516       | [0.167, 1.600] | 0.252  |
|                                 | Duration of PsA prior to baseline                                                           | 0.195       | [0.050, 0.753] | 0.018  |
| <b>Systemic treatment</b>       | NSAID (treatment prior to baseline)                                                         | 0.346       | [0.117, 1.021] | 0.055  |
|                                 | Corticosteroids (irrespective of dosage; treatment prior to baseline)                       | 2.990       | [1.392, 6.421] | 0.005  |
|                                 | Low dose oral corticosteroids (treatment prior to baseline)                                 | 2.099       | [0.901, 4.890] | 0.086  |
|                                 | High dose oral corticosteroids (treatment prior to baseline)                                | 3.728       | [1.484, 9.368] | 0.005  |
|                                 | Steroid pulse therapy (treatment prior to baseline)                                         | 3.237       | [1.108, 9.461] | 0.032  |
| <b>csDMARDs</b>                 | csDMARDs (irrespective of drug; treatment prior to baseline)                                | 2.685       | [1.069, 6.749] | 0.036  |
|                                 | Hydroxychloroquine (treatment prior to baseline)                                            | 0.000       | [0.000, Inf]   | 0.997  |
|                                 | Sulfasalazin (treatment prior to baseline)                                                  | 0.640       | [0.087, 4.728] | 0.662  |
|                                 | Methotrexate (treatment prior to baseline)                                                  | 2.261       | [0.941, 5.435] | 0.068  |
|                                 | Azathioprine (treatment prior to baseline)                                                  | 0.000       | [0.000, Inf]   | 0.998  |
|                                 | Cyclosporine A (treatment prior to baseline)                                                | NA          | [ NA, NA]      | NA     |
|                                 | Leflunomide (treatment prior to baseline)                                                   | 0.000       | [0.000, Inf]   | 0.998  |
| <b>bDMARDs</b>                  | bDMARDs (irrespective of drug; treatment prior to baseline)                                 | 1.270       | [0.476, 3.384] | 0.633  |
|                                 | Anti-TNF (any drug; treatment prior to baseline)                                            | NA          | [ NA, NA]      | NA     |
|                                 | Etanercept (treatment prior to baseline)                                                    | 1.550       | [0.572, 4.202] | 0.389  |
|                                 | Adalimumab (treatment prior to baseline)                                                    | 0.000       | [0.000, Inf]   | 0.998  |
|                                 | Abatacept (treatment prior to baseline)                                                     | 0.000       | [0.000, Inf]   | 0.998  |
|                                 | Tocilizumab (treatment prior to baseline)                                                   | NA          | [ NA, NA]      | NA     |
|                                 | Canakinumab (treatment prior to baseline)                                                   | NA          | [ NA, NA]      | NA     |
|                                 | Other bDMARDs (treatment prior to baseline)                                                 | NA          | [ NA, NA]      | NA     |
|                                 | NSAID only (irrespective of drug; treatment prior to baseline)                              | 0.826       | [0.332, 2.056] | 0.681  |
|                                 | NSAID / Corticosteroids only (irrespective of drug; treatment prior to baseline)            | 4.034       | [1.879, 8.661] | <0.001 |
|                                 | NSAID / Corticosteroids / csDMARDs only (irrespective of drug; treatment prior to baseline) | 2.783       | [1.107, 6.999] | 0.030  |
|                                 | NSAID / Corticosteroids / bDMARDs only (irrespective of drug; treatment prior to baseline)  | 0.000       | [0.000, Inf]   | 0.997  |
|                                 | combined DMARD therapy (irrespective of drug; treatment prior to baseline)                  | 2.019       | [0.641, 6.362] | 0.230  |

**Suppl. Table 2. Correlates for development of uveitis in the PsA\_1 group: Results of univariable Cox regression analysis**

ANA: antinuclear antibodies; HLA-B27: Human Leukocyte Antigen-B27; PsA: juvenile psoriasis arthritis; HAQ: health assessment questionnaire; cJADAS10: Juvenile Arthritis Disease Activity Score 10; PGA (NRS): physician's global assessment (numeric rating scale); ESR: erythrocyte sedimentation rate; NSAID: non-steroidal anti-inflammatory drugs; low dose steroids: dosage below 0.1mg/kg bodyweight; high dose steroids: dosage of 0.1mg/kg bodyweight or higher; DMARD disease modifying antirheumatic drugs; csDMARD conventional-synthetic DMARD; bDMARD biological DMARD
